# Supplementary figures and images for: The type 1 diabetes candidate genes PTPN2 and BACH2 regulate novel IFN-α-induced crosstalk between the JAK/STAT and MAPKs pathways in human beta cells
Source: Research Square preprint supplement (doi:10.21203/rs.3.rs-6079043/v1), 2025-03-12

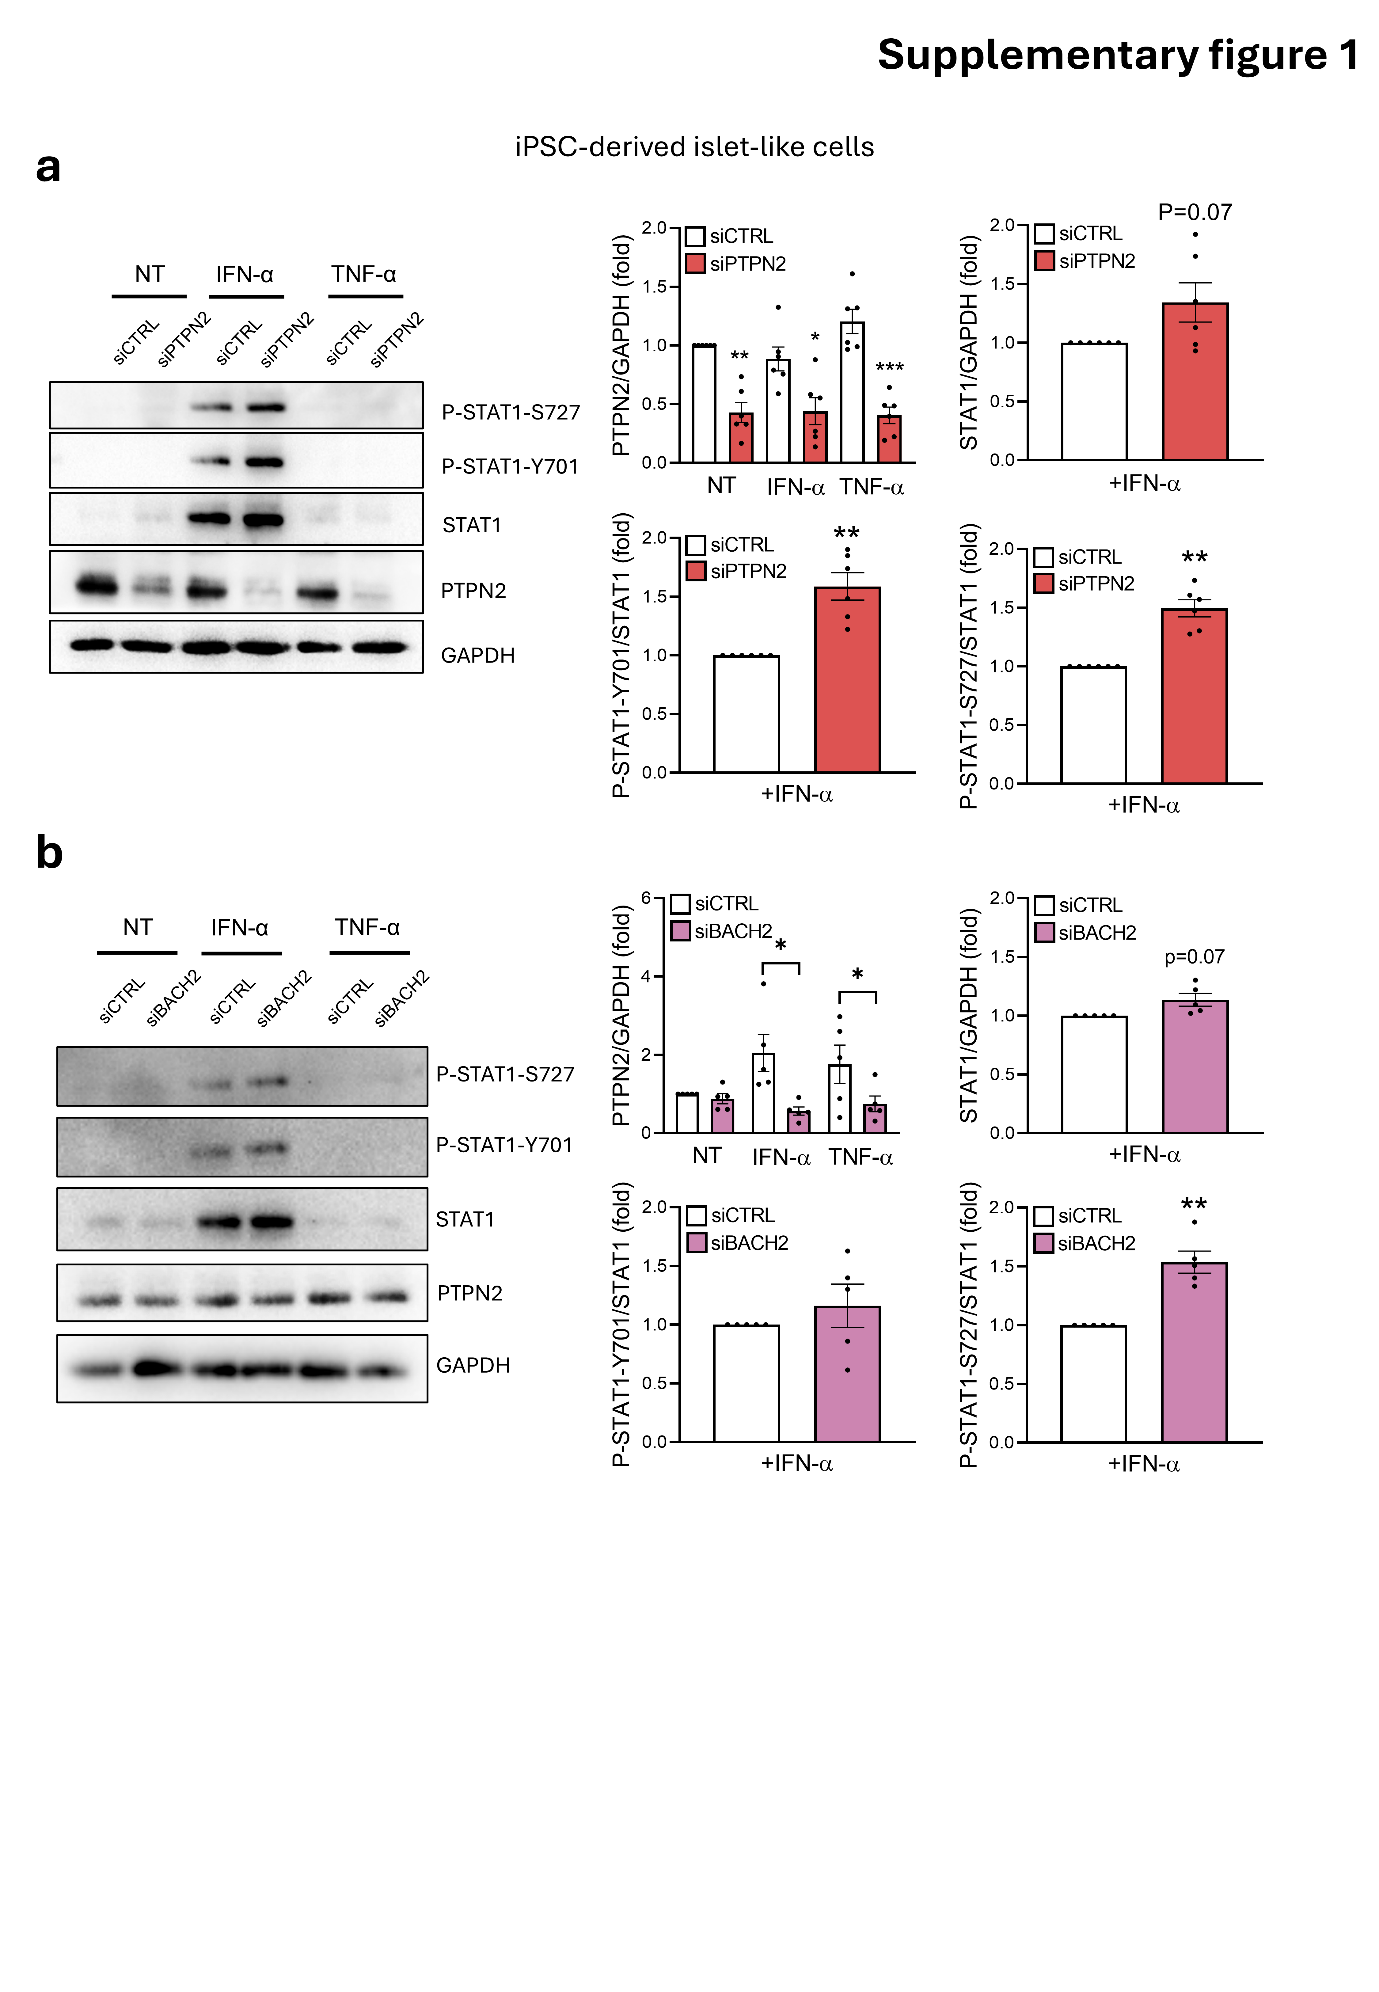

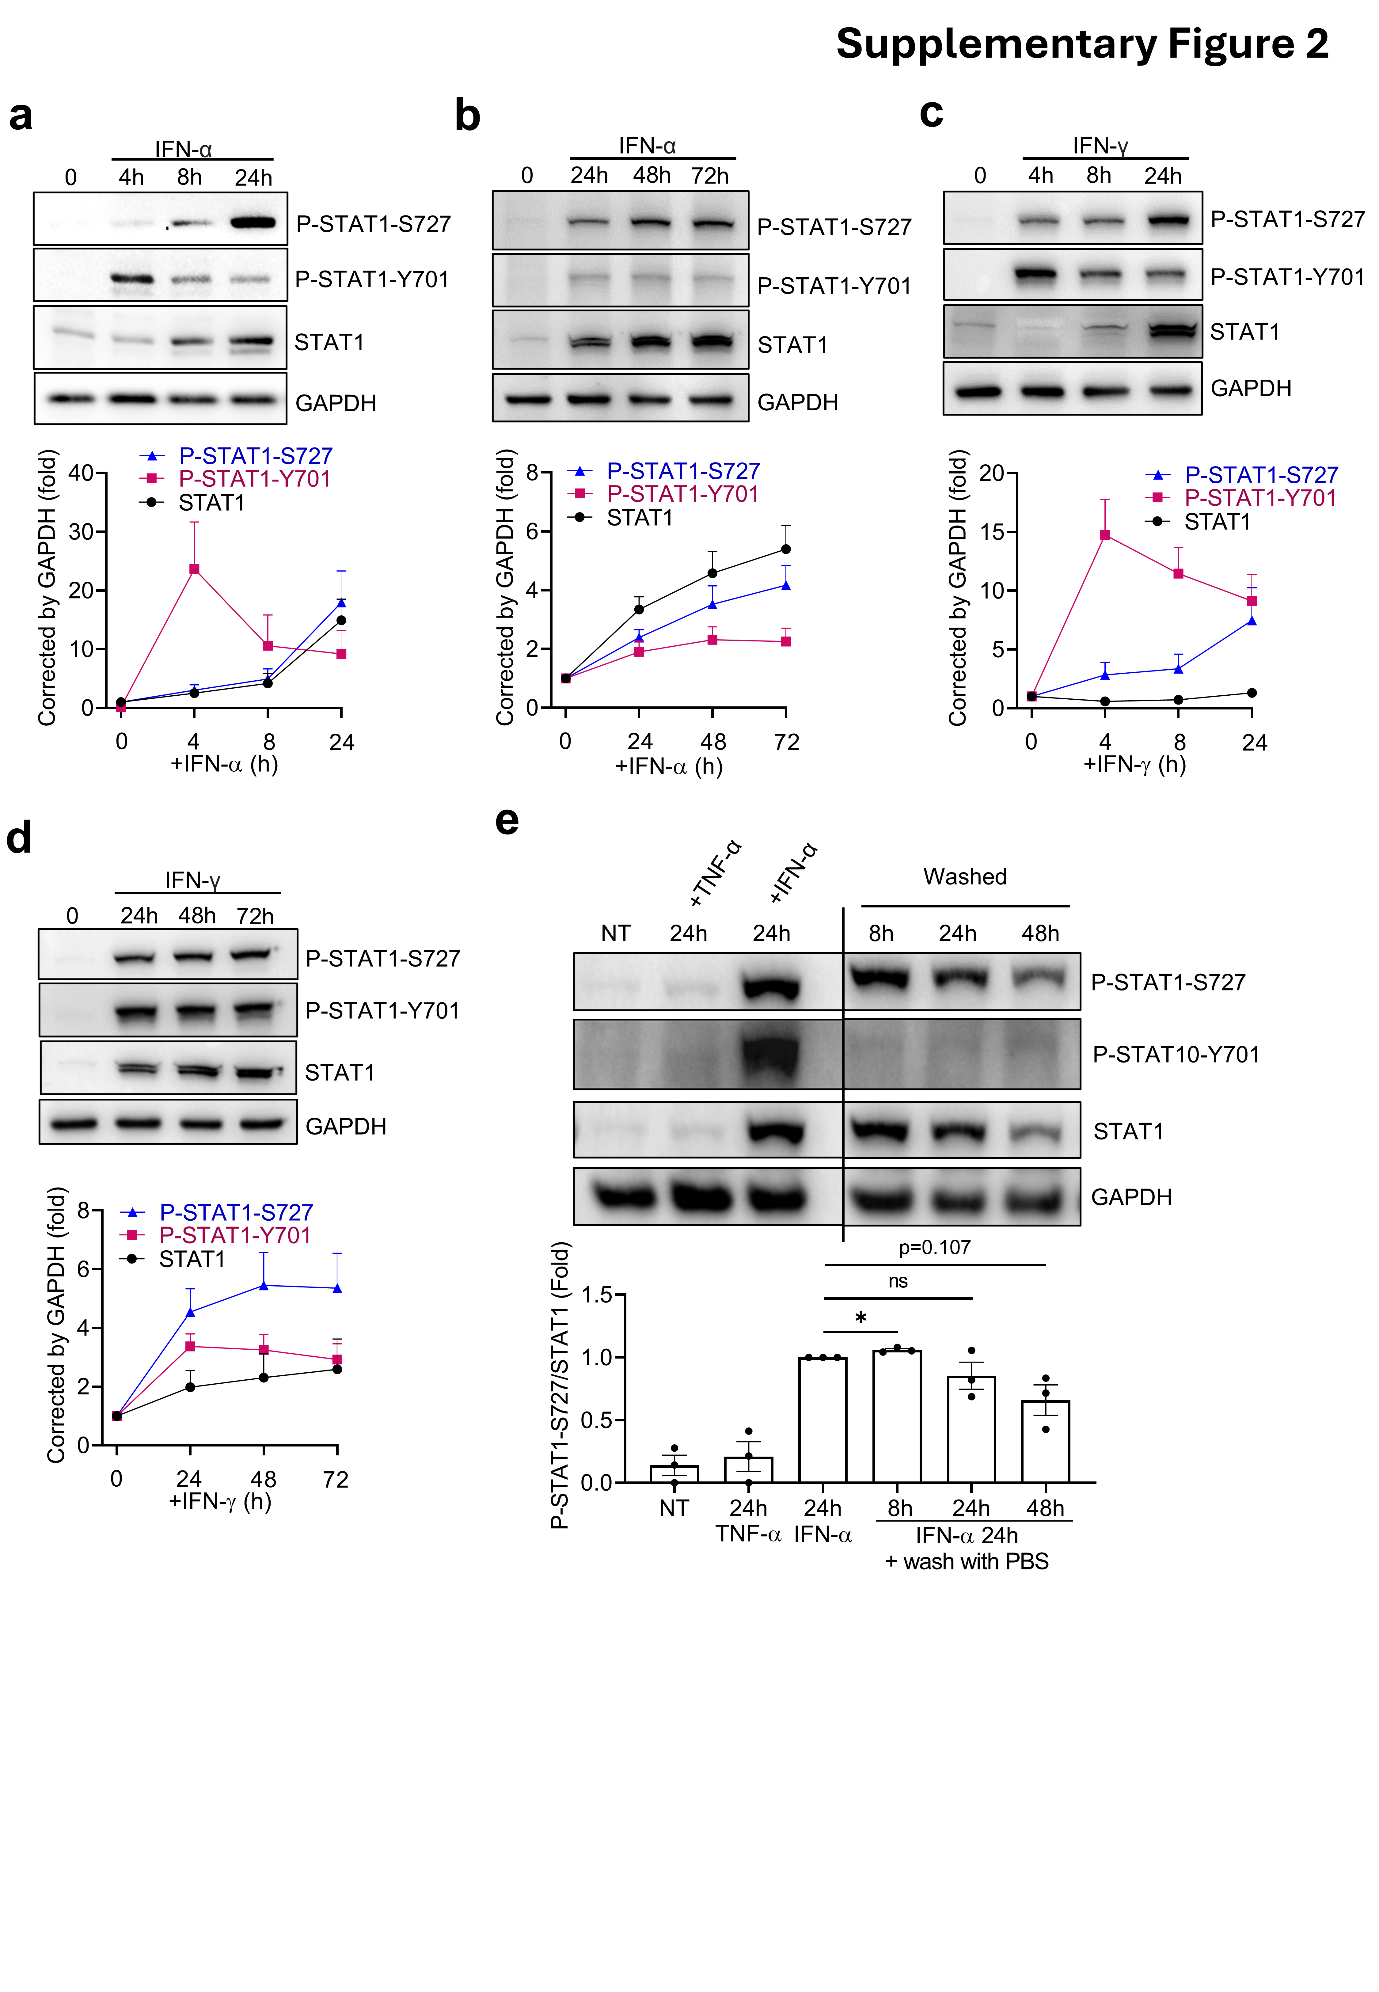

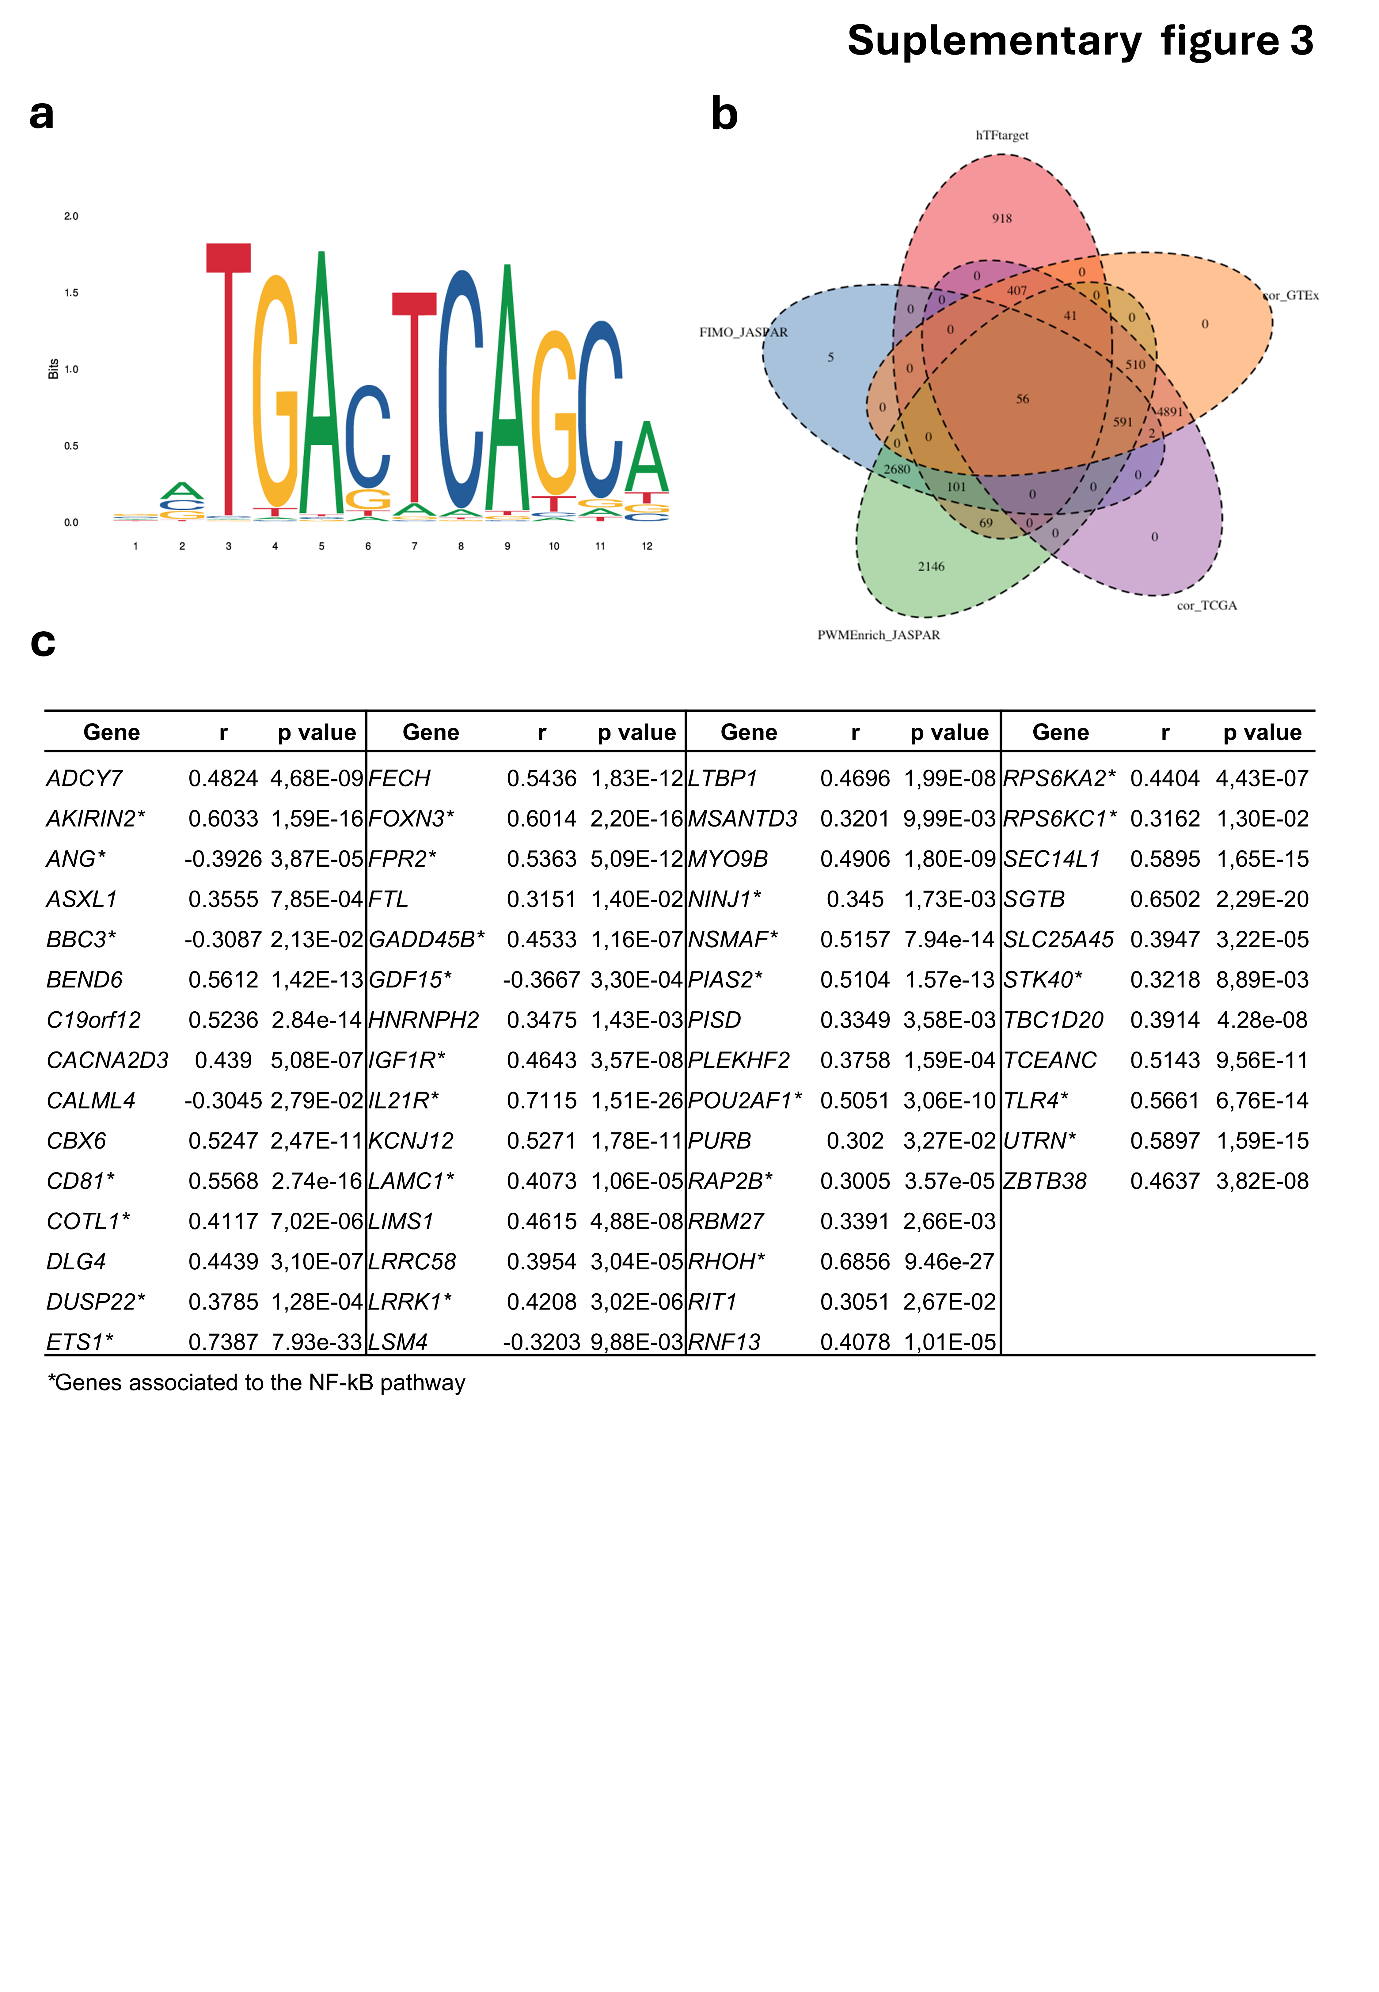

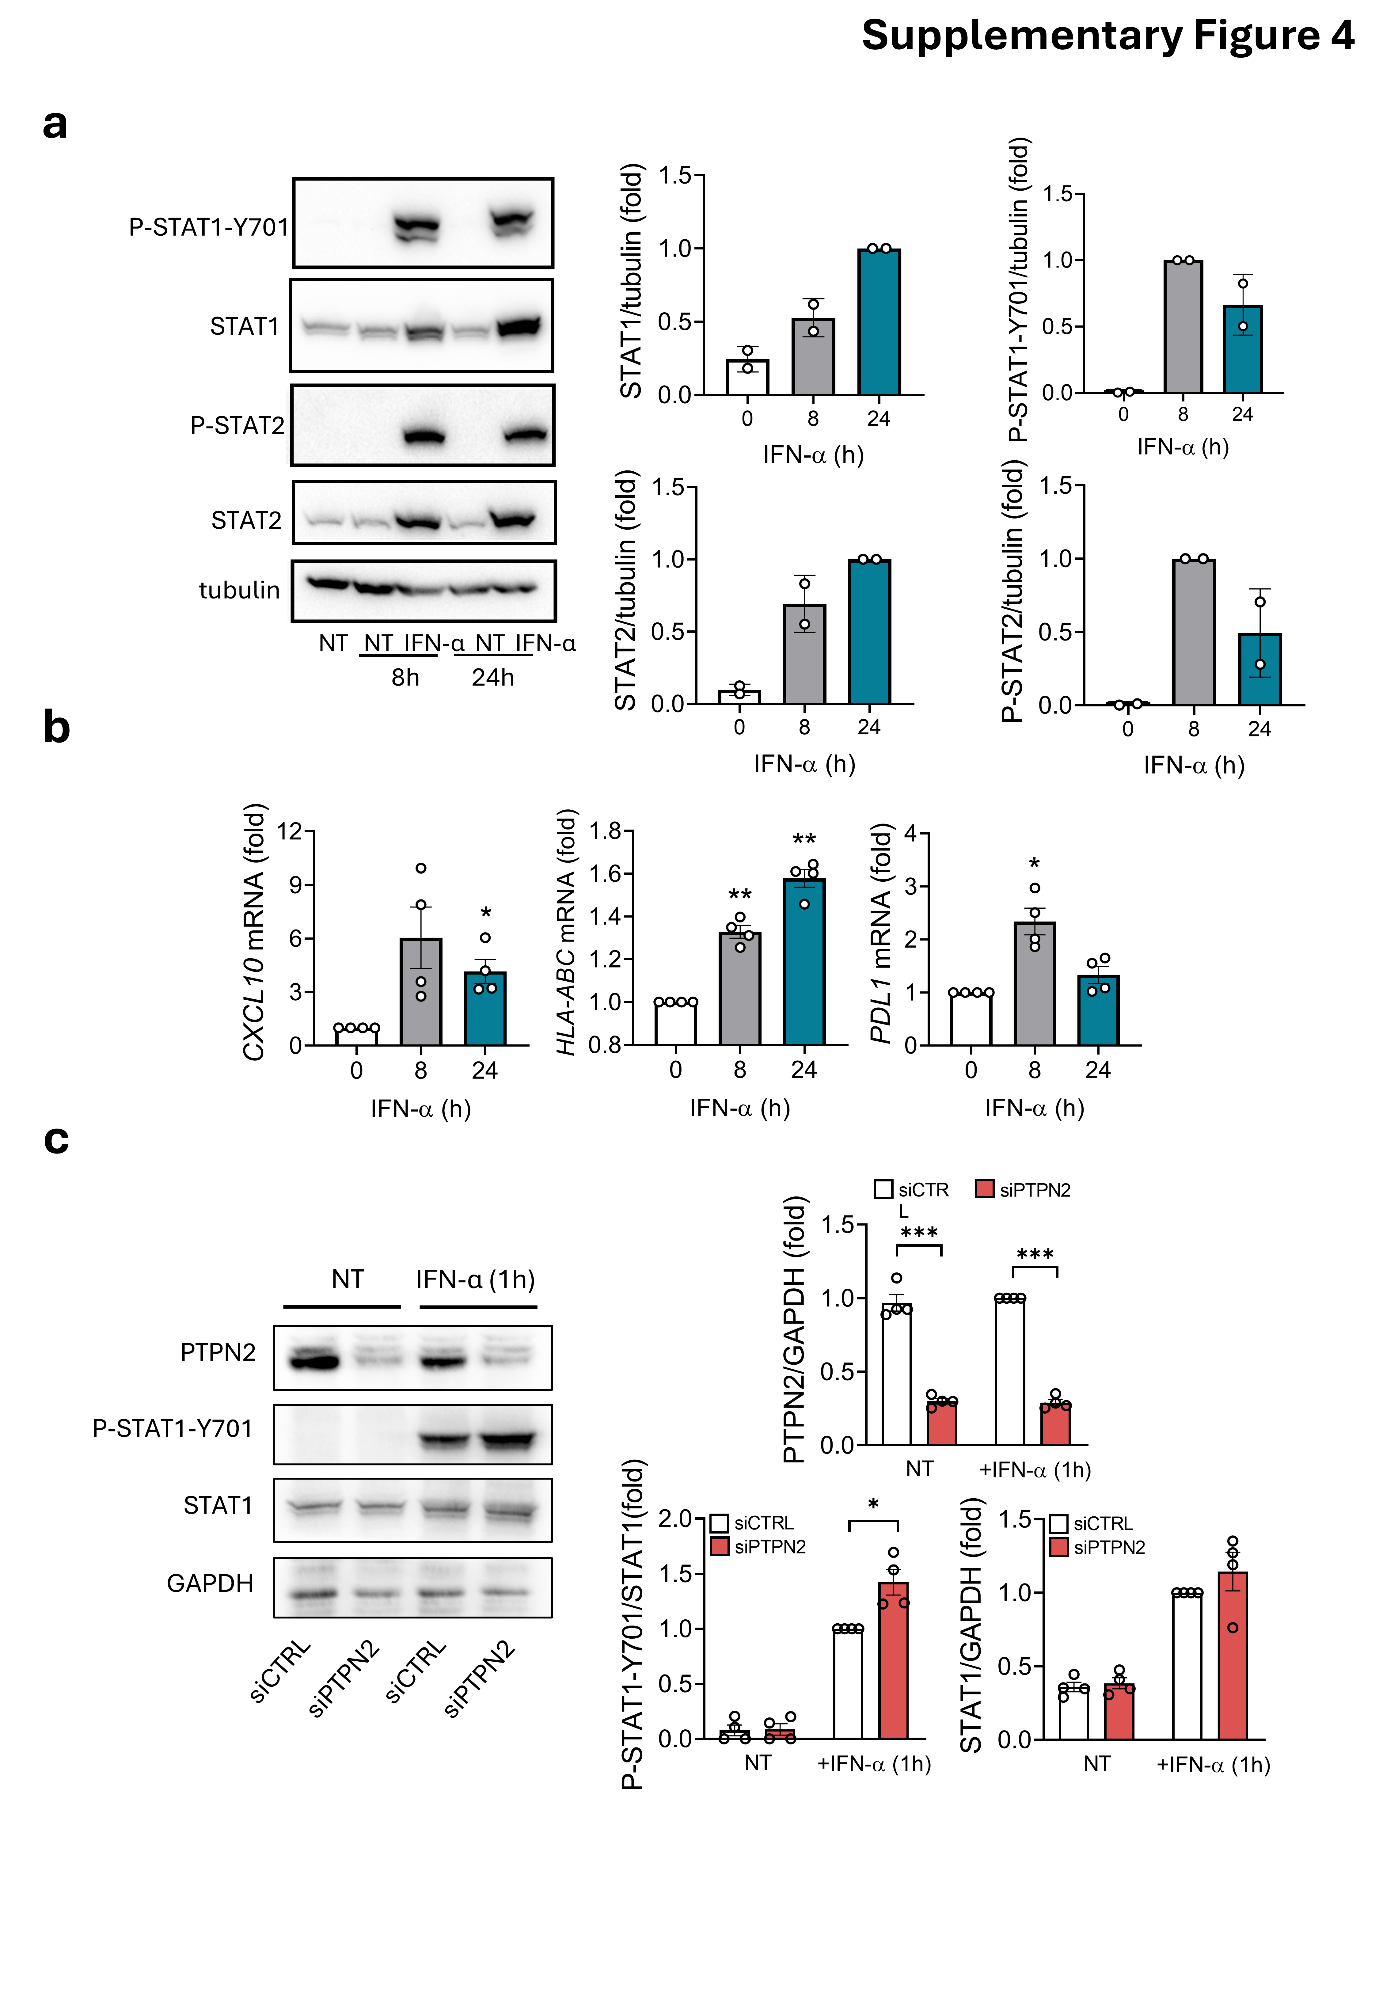

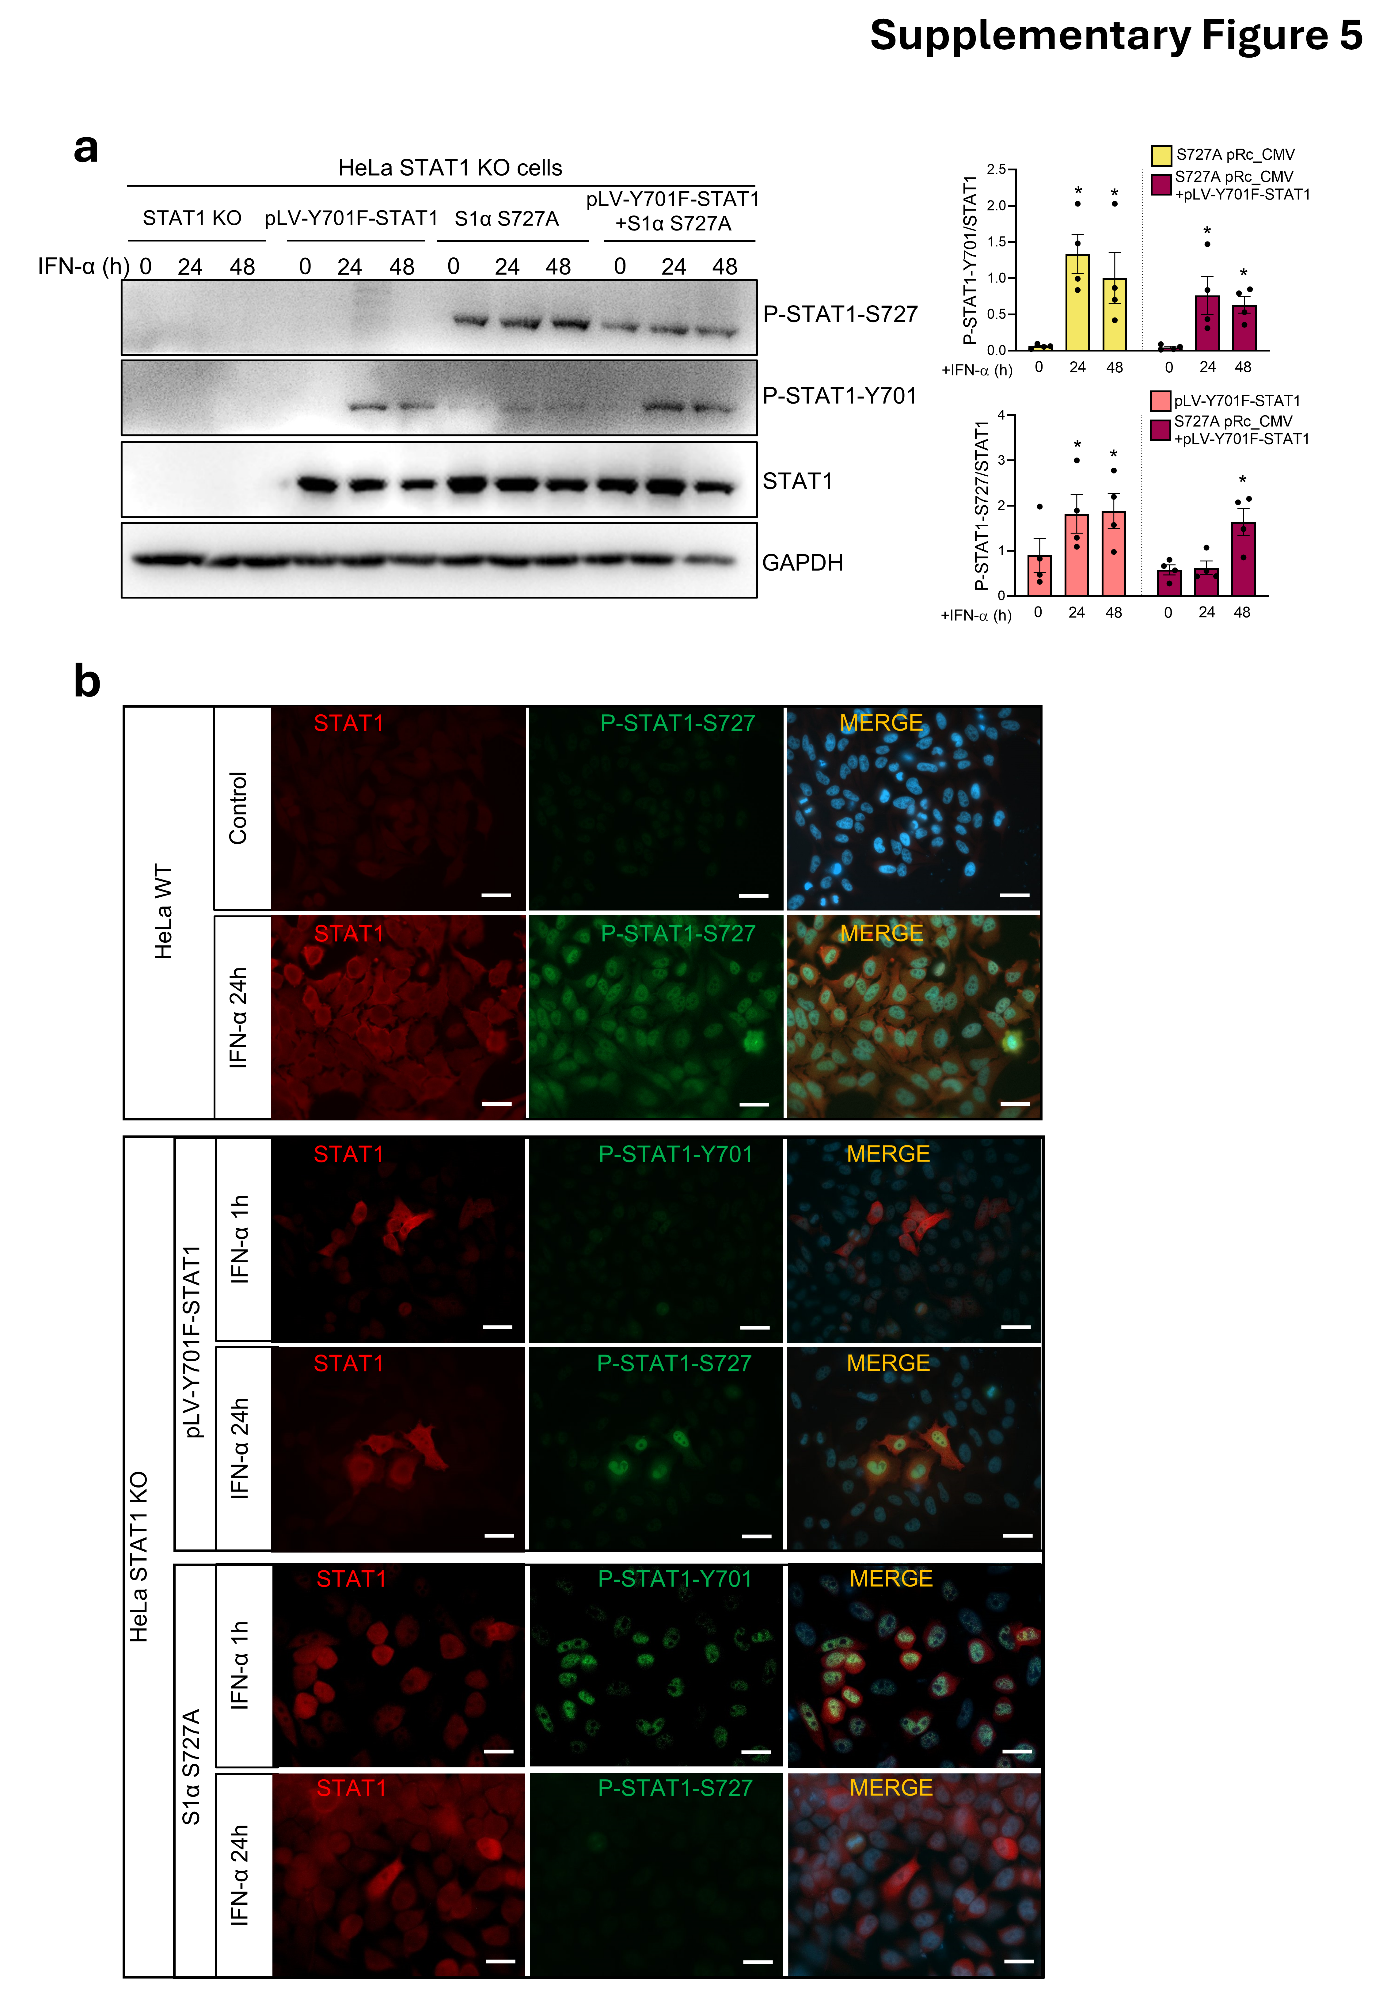

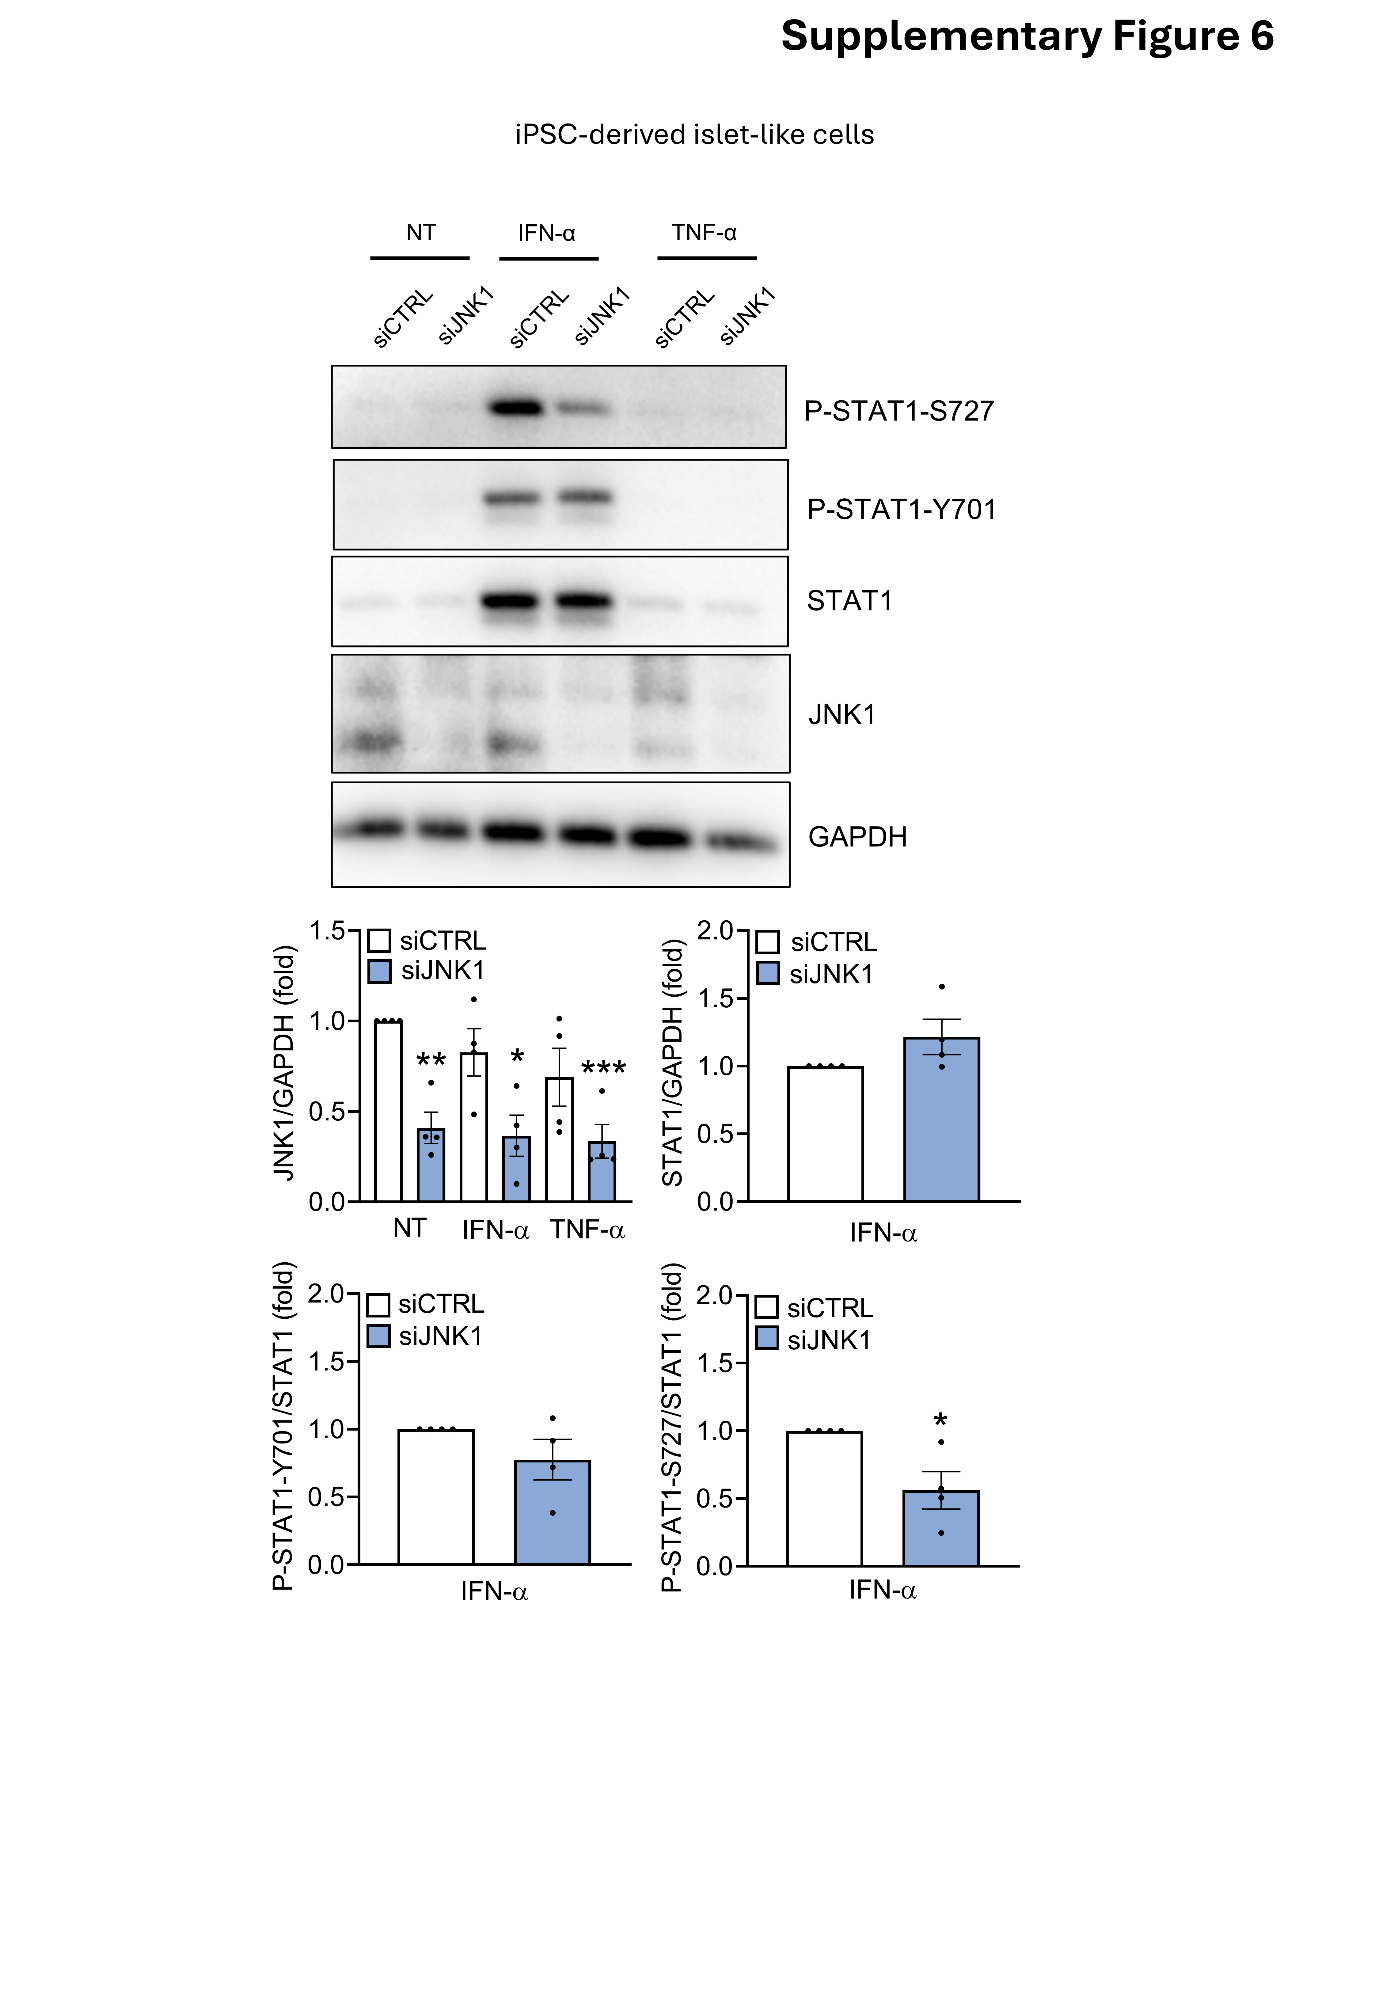

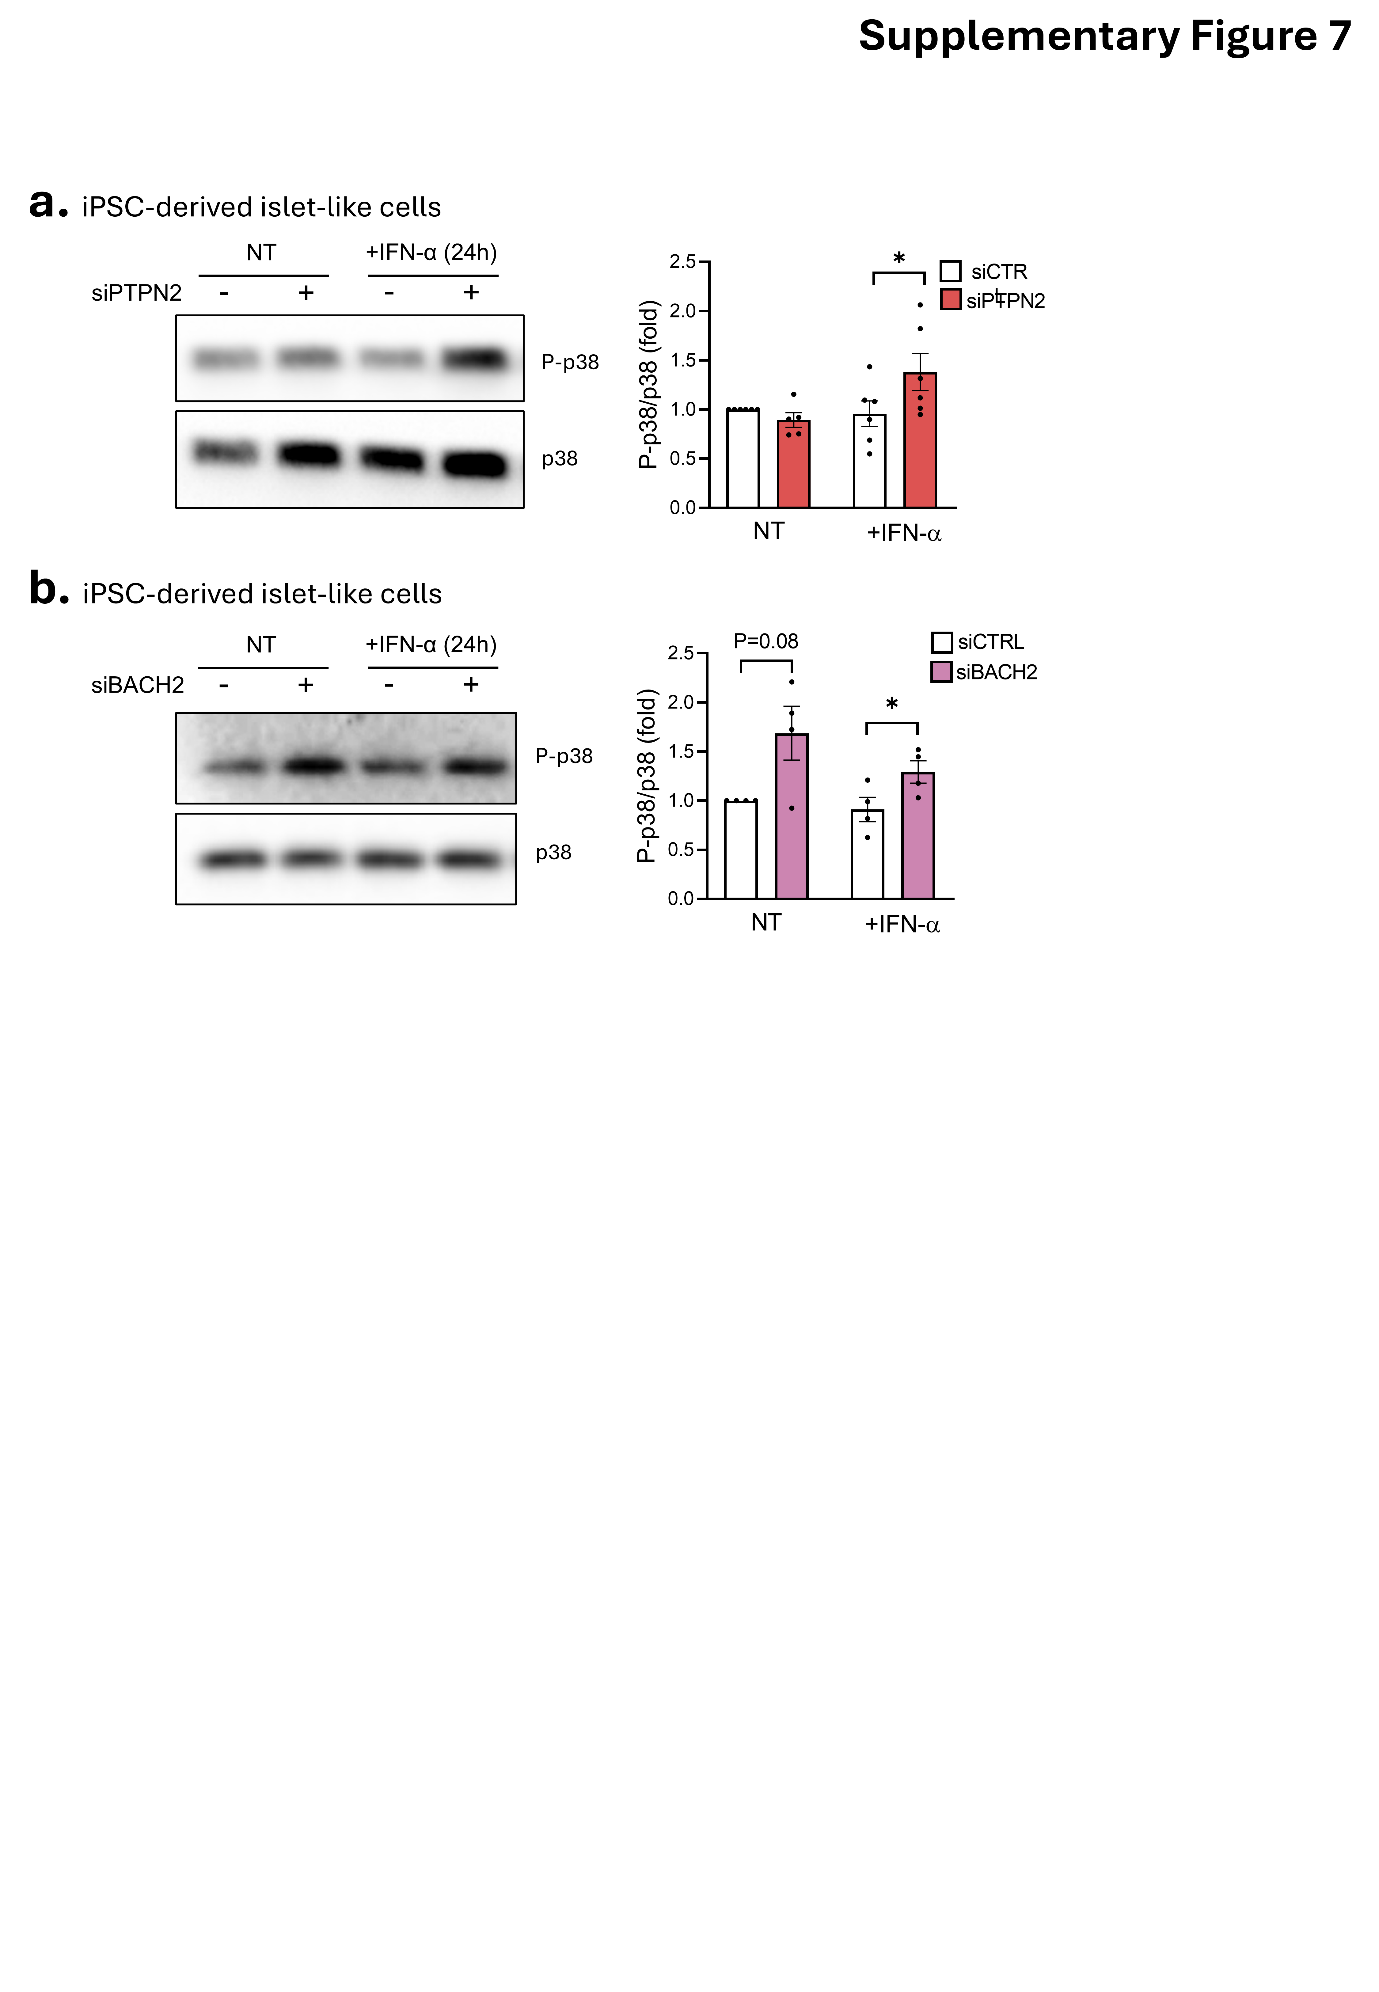

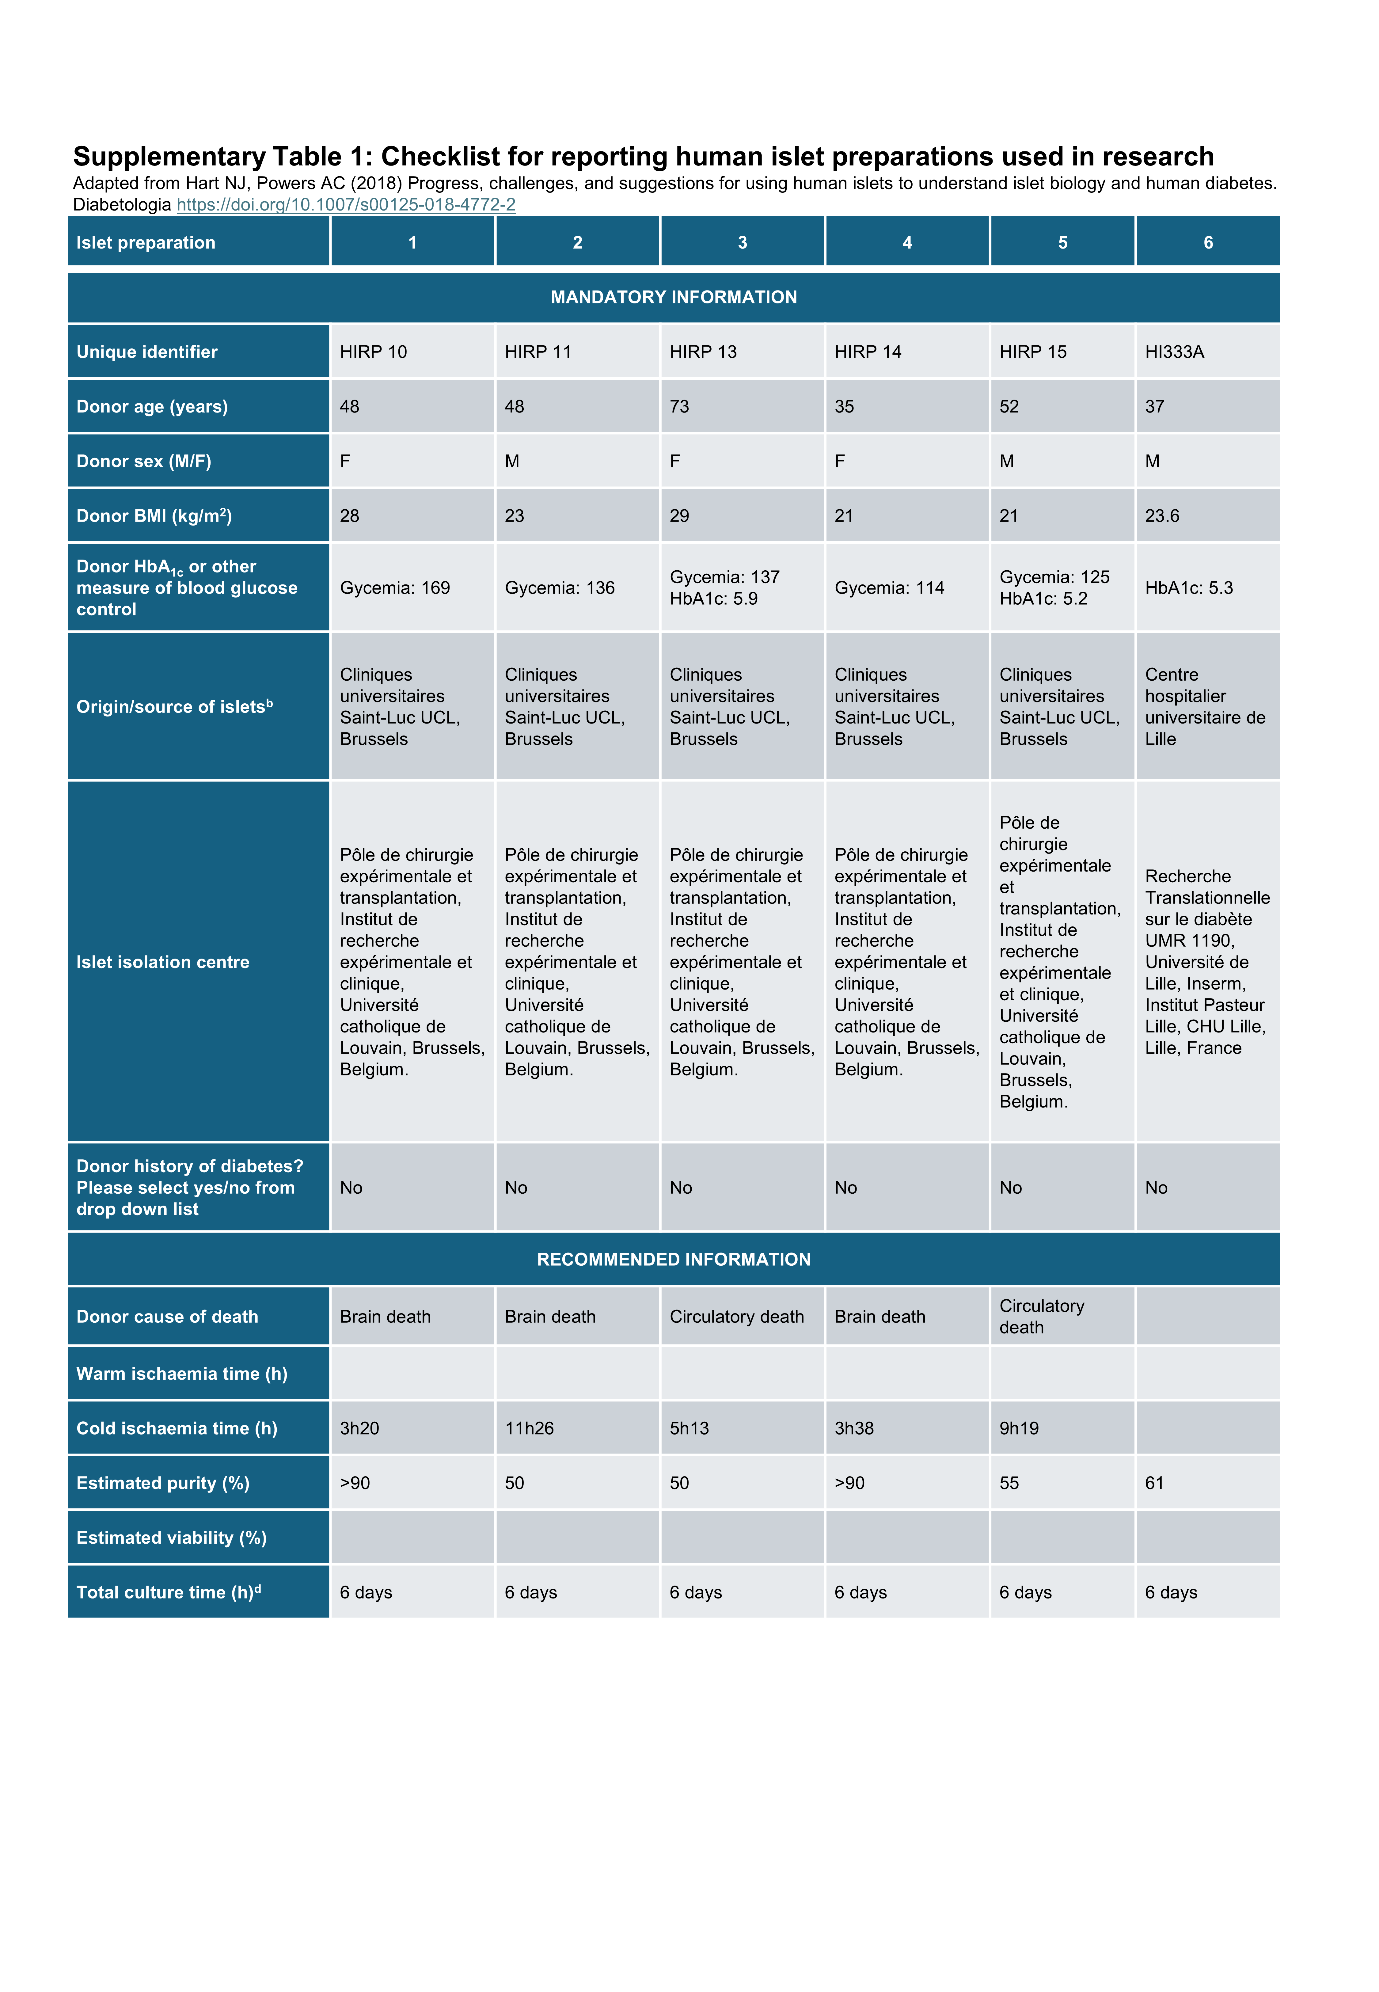

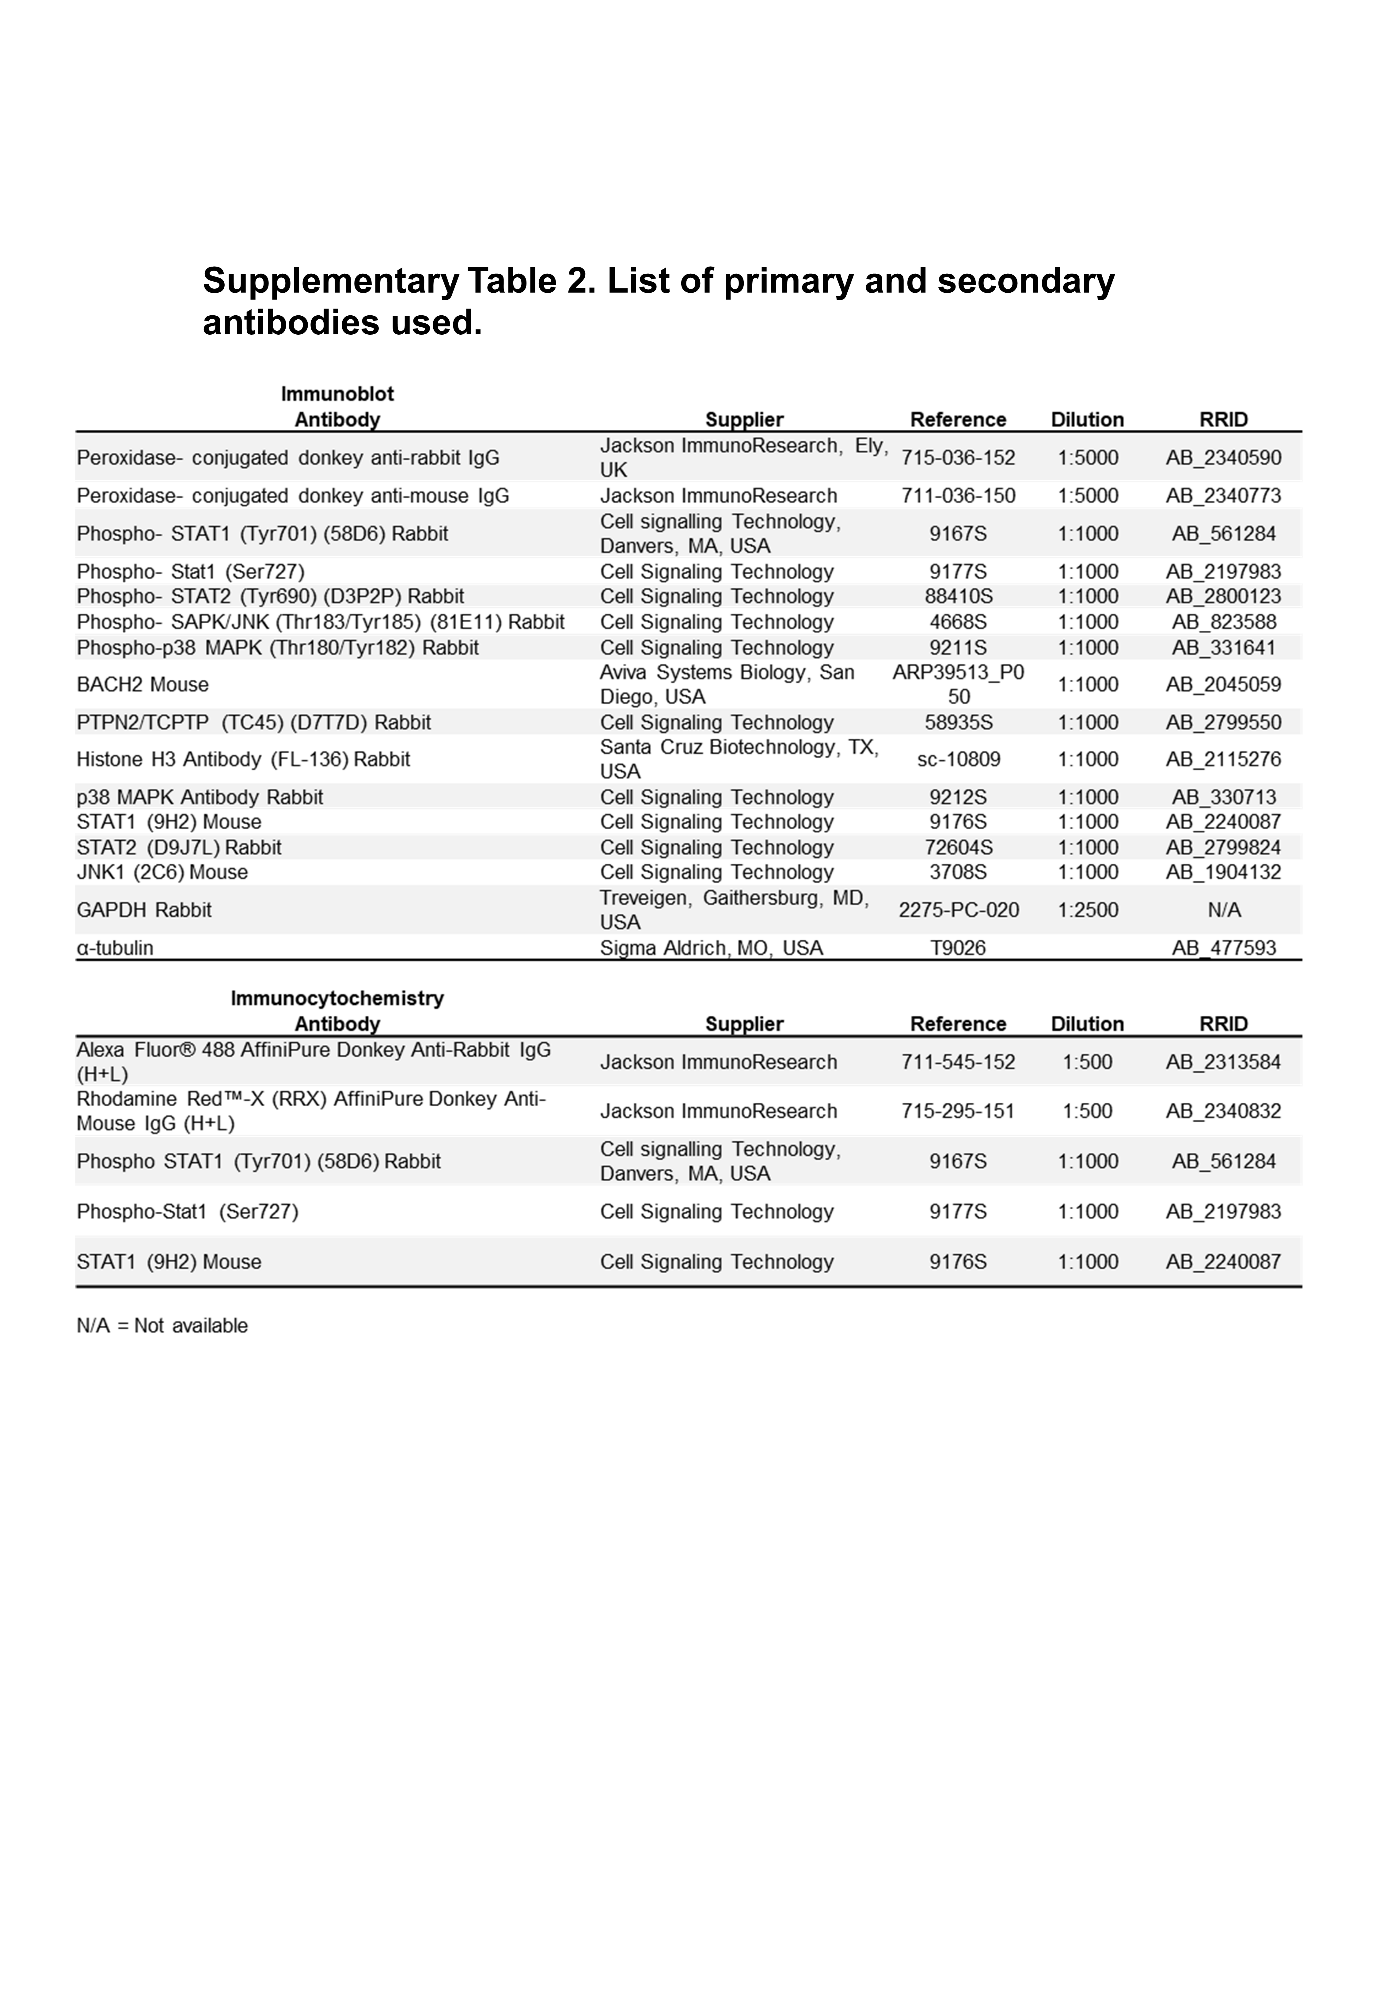

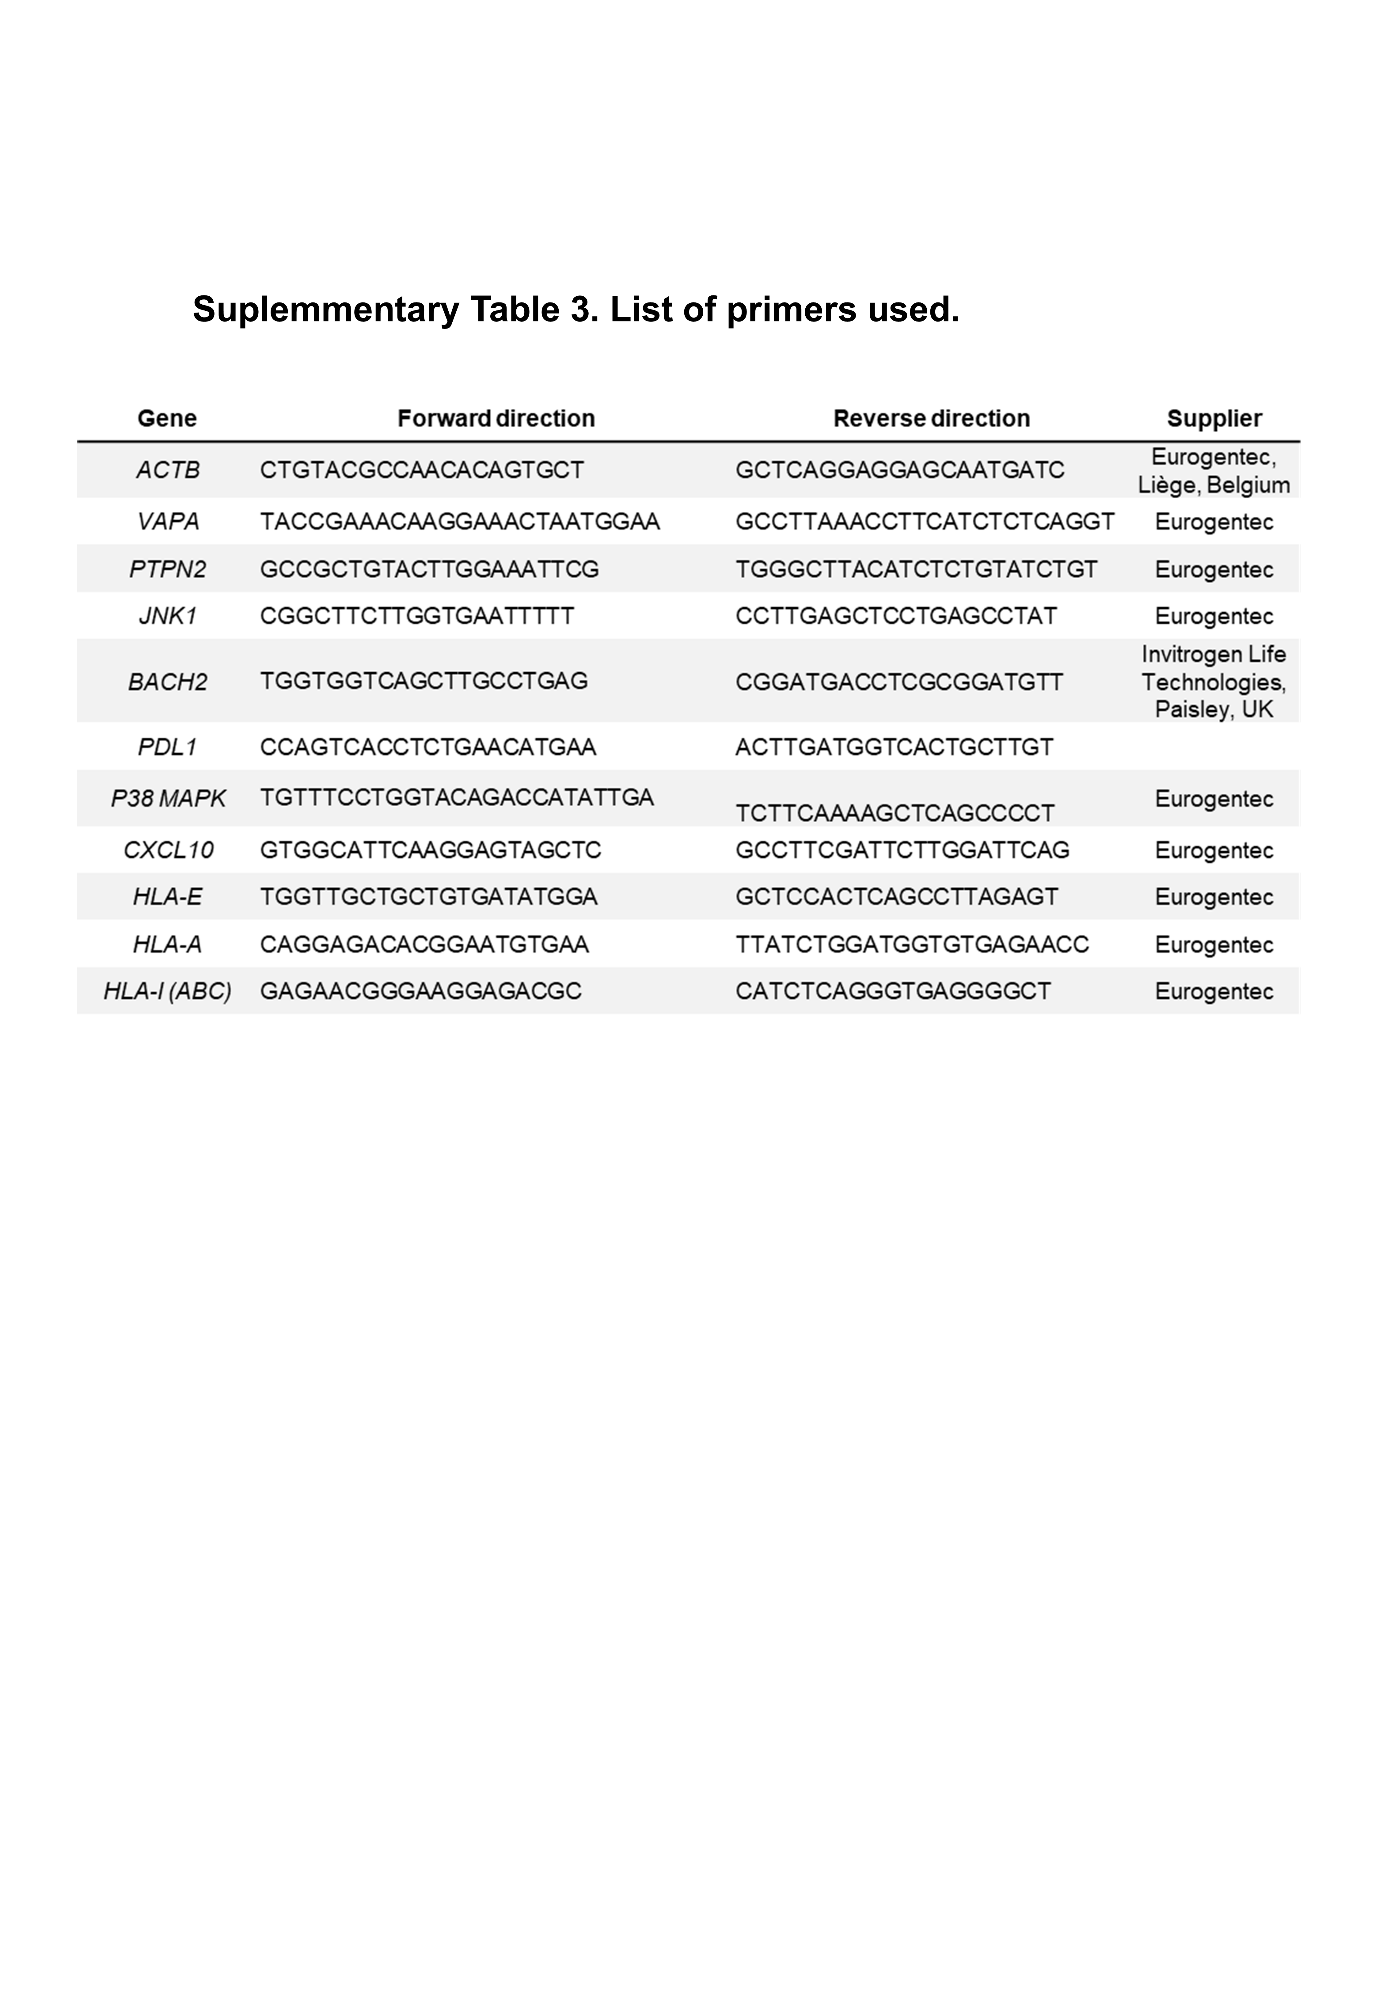

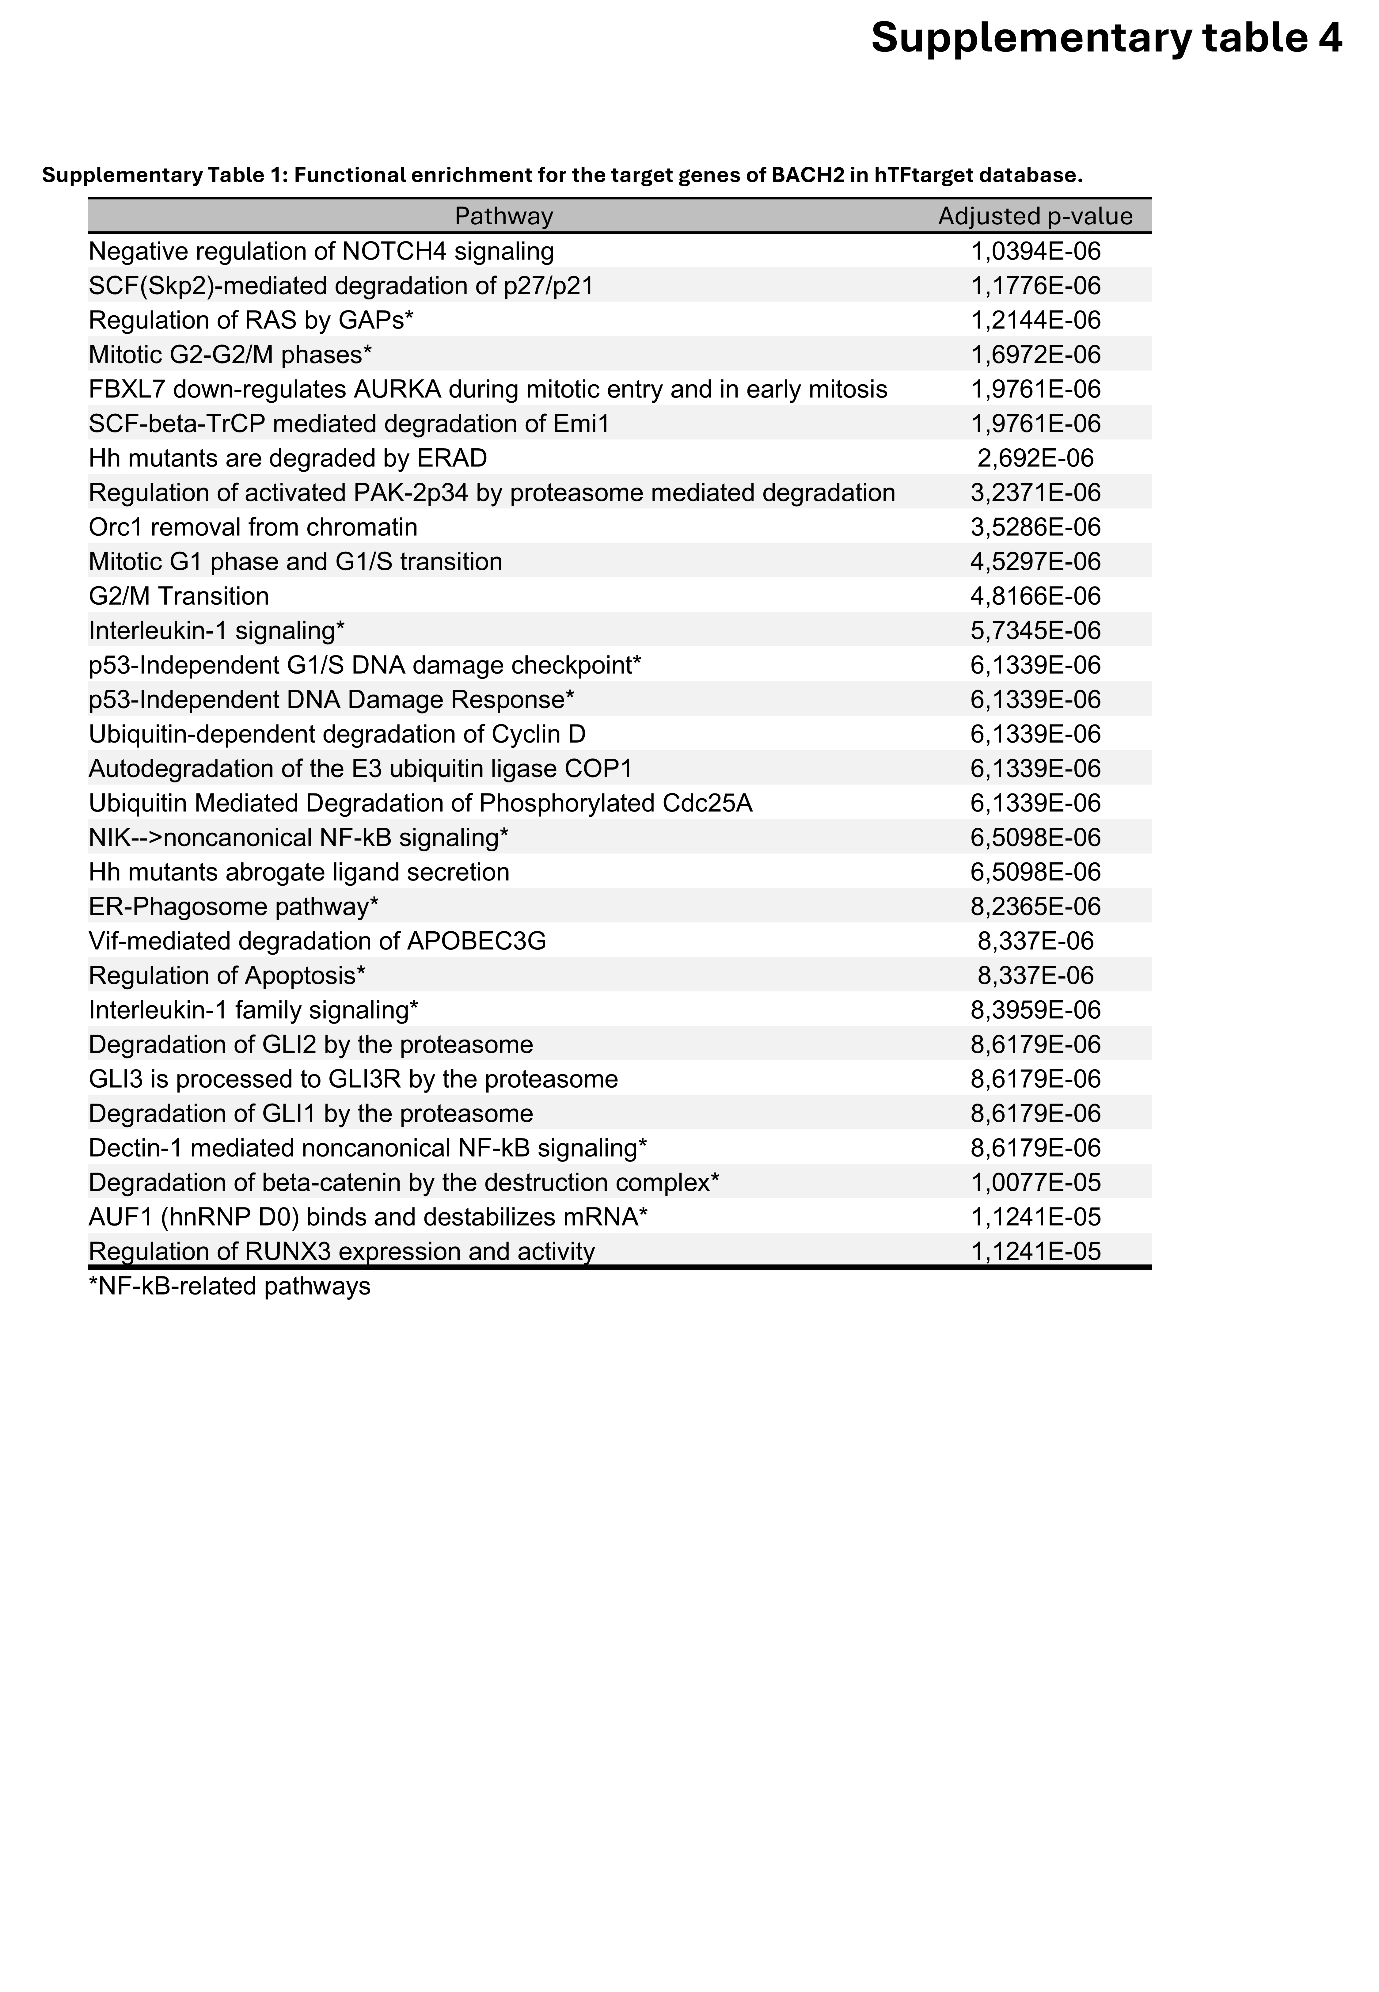

Supplement: Supplementary file 1 [file bbacab99ff1f60cd9839c9be.docx]
